# Supplementary material for: Grafting of doxycycline imprinted polymers on silica surface for selective solid-phase extraction in beef samples
Source: Royal Society of Chemistry journal article supplement (doi:10.1039/c2ay26084k), 2012-01-01
Supplement: c2ay26084k.pdf [file c2ay26084k.pdf]

### Originally figure 8:

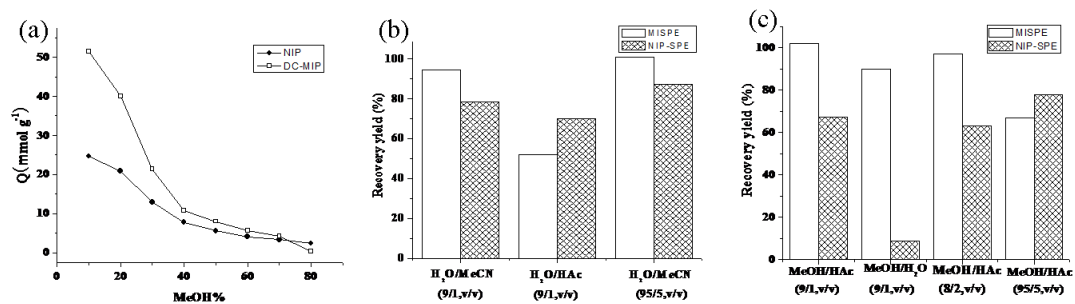

Fig.8. The choice of the washing solution and the eluent: (a) Adsorption capacity of DC-MIPs and NIPs in different percent of methanol; (b) The recoveries of DC extracted by DC-MISPE and NIP-SPE with different washing solution; (c) The recoveries of DC extracted by DC-MISPE and NIP-SPE with different elution.

### Originally figure 9:

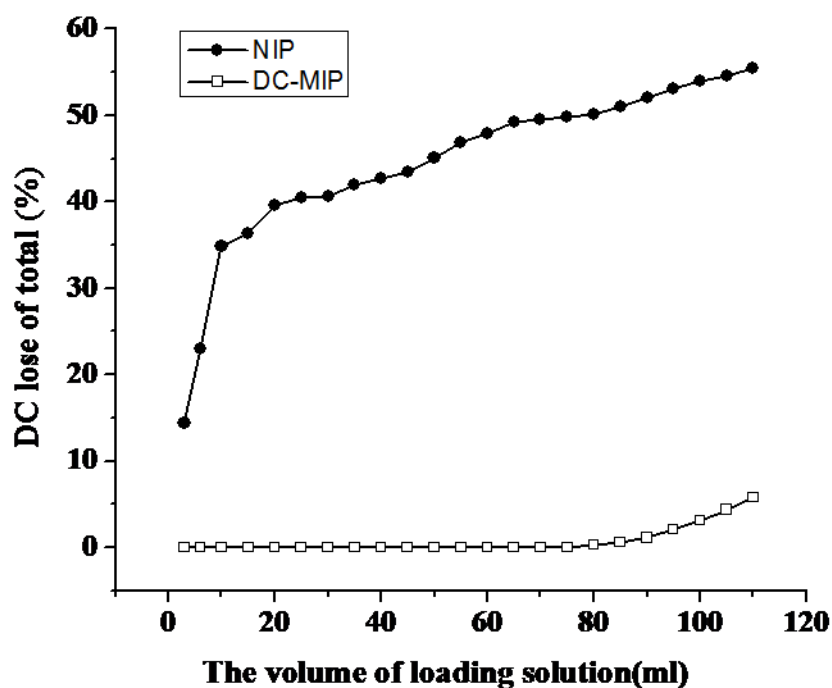

Fig.9. The breakthrough volumn of DC-MISPE and NIP-SPE.

## Originally table 1 and table 2:

Table.1 The average recoveries of a mixture sample of OTC, CTC and DC (n=3)

|     | OTC        |       | CTC        |       | DC         |       |
|-----|------------|-------|------------|-------|------------|-------|
|     | Recovery % | RSD % | Recovery % | RSD % | Recovery % | RSD % |
| MIP | 43.1       | 10    | 58.1       | 2.5   | 99.6       | 1.8   |
| NIP | 4.4        | 2.0   | 12.8       | 14.0  | 21.2       | 19.0  |

Table 2 The spiked recoveries of DC-MISPE for DC (n=3)

| Spiking levels<br>( $\mu\text{g mL}^{-1}$ ) | MIP        |       | NIP        |       |
|---------------------------------------------|------------|-------|------------|-------|
|                                             | Recovery % | RSD % | Recovery % | RSD % |
| 0.10                                        | 102.7      | 1.3   | 25.3       | 2.3   |
| 1.00                                        | 99.1       | 1.4   | 22.7       | 2.4   |
| 10.00                                       | 99.7       | 0.2   | 52.4       | 3.2   |
| 50.00                                       | 100.5      | 0.3   | 61.2       | 0.4   |
